# Supplementary material
Source: PubMed Central journal article supplement (PMC5589084)
Supplement: mmc1.pdf [file mmc1.pdf]

## **Supplemental Information**

### **Regulated Expansion and Survival of Chimeric Antigen Receptor-Modified T Cells Using Small Molecule-Dependent Inducible MyD88/CD40**

**Aaron E. Foster, Aruna Mahendravada, Nicholas P. Shinnars, Wei-Chun Chang, Jeannette Crisostomo, An Lu, Mariam Khalil, Eva Morschl, Joanne L. Shaw, Sunandan Saha, MyLinh T. Duong, Matthew R. Collinson-Pautz, David L. Torres, Tania Rodriguez, Tsvetelina Pentcheva-Hoang, J. Henri Bayle, Kevin M. Slawin, and David M. Spencer**

**SUPPLEMENTAL TABLES****Supplemental Table 1. Fold-change in cytokine production following iMC activation with rimiducid.**

| <b>Cytokine production (fold-increase)</b> |     |  |                    |     |
|--------------------------------------------|-----|--|--------------------|-----|
| <b>Induced</b>                             |     |  | <b>Non-induced</b> |     |
| GM-CSF                                     | 2.0 |  | IL-2               | 1.1 |
| IFN- $\gamma$                              | 3.4 |  | IL-4               | 1.4 |
| IL-13                                      | 4.6 |  | IL-7               | 1.3 |
| IL-5                                       | 2.4 |  | IL-10              | 1.2 |
| IL-8                                       | 2.8 |  | IL-12p70           | 1.3 |
| IP-10                                      | 5.8 |  | IL-15              | 0.9 |
| TNF- $\alpha$                              | 2.6 |  | IL-17              | 1.1 |

Calculated as fold-increase following 10 nM rimiducid stimulation compared to iMC-modified T cells cultured in media alone.

**Supplemental Table 2. Gene ontology pathway analysis.**

| Name                          | P-value  |
|-------------------------------|----------|
| Apoptosis GenMAPP             | 5.41E-08 |
| Apoptosis                     | 7.14E-08 |
| Eicosanoid synthesis          | 0.0004   |
| Cholesterol biosynthesis      | 0.002    |
| Inflammatory response pathway | 0.002    |
| Small ligand GPCRs            | 0.002    |
| Apoptosis KEGG                | 0.003    |
| Nuclear receptors             | 0.004    |
| Hypertrophy model             | 0.004    |
| S1P signaling                 | 0.006    |
| Smooth muscle contraction     | 0.01     |
| MAPK cascade                  | 0.03     |

**Supplemental Table 3. KEGG pathway gene enrichment signature.**

| Gene Set Name                               | # Genes in Gene Set (K) | # Genes in Overlap (k) | k/K    | p-value  | FDR q-value |
|---------------------------------------------|-------------------------|------------------------|--------|----------|-------------|
| KEGG_SMALL_CELL_LUNG_CANCER                 | 84                      | 10                     | 0.119  | 1.52E-10 | 2.82E-08    |
| KEGG_PATHWAYS_IN_CANCER                     | 328                     | 16                     | 0.0488 | 4.04E-10 | 3.76E-08    |
| KEGG_CYTOKINE_CYTOKINE_RECEPTOR_INTERACTION | 267                     | 13                     | 0.0487 | 1.85E-08 | 1.15E-06    |
| KEGG_MAPK_SIGNALING_PATHWAY                 | 267                     | 11                     | 0.0412 | 1.21E-06 | 5.64E-05    |
| KEGG_TOLL_LIKE_RECEPTOR_SIGNALING_PATHWAY   | 102                     | 7                      | 0.0686 | 4.01E-06 | 1.49E-04    |
| KEGG_JAK_STAT_SIGNALING_PATHWAY             | 155                     | 8                      | 0.0516 | 6.87E-06 | 2.13E-04    |
| KEGG_APOPTOSIS                              | 88                      | 6                      | 0.0682 | 2.07E-05 | 5.49E-04    |
| KEGG_FOCAL_ADHESION                         | 201                     | 8                      | 0.0398 | 4.47E-05 | 9.48E-04    |
| KEGG_NOD_LIKE_RECEPTOR_SIGNALING_PATHWAY    | 62                      | 5                      | 0.0806 | 4.59E-05 | 9.48E-04    |
| KEGG_T_CELL_RECEPTOR_SIGNALING_PATHWAY      | 108                     | 6                      | 0.0556 | 6.57E-05 | 1.22E-03    |

**Supplemental Table 4. Transcription factor target gene enrichment signature.**

| Gene Set Name        | # Genes in Gene Set (K) | # Genes in Overlap (k) | k/K    | p-value  | FDR q-value |
|----------------------|-------------------------|------------------------|--------|----------|-------------|
| GGGCGGR_V\$SP1_Q6    | 2940                    | 64                     | 0.0218 | 1.56E-18 | 9.57E-16    |
| V\$NFKB_Q6           | 254                     | 19                     | 0.0748 | 4.43E-15 | 1.36E-12    |
| CAGGTG_V\$E12_Q6     | 2485                    | 52                     | 0.0209 | 2.17E-14 | 4.45E-12    |
| V\$NFKAPPAB_01       | 251                     | 17                     | 0.0677 | 6.32E-13 | 9.72E-11    |
| GGGAGGRR_V\$MAZ_Q6   | 2274                    | 45                     | 0.0198 | 1.02E-11 | 1.06E-09    |
| V\$CREL_01           | 256                     | 16                     | 0.0625 | 1.03E-11 | 1.06E-09    |
| V\$NFKAPPAB65_01     | 237                     | 15                     | 0.0633 | 3.86E-11 | 3.39E-09    |
| RYTTCCTG_V\$ETS2_B   | 1085                    | 29                     | 0.0267 | 8.17E-11 | 6.28E-09    |
| RTAAACA_V\$FREAC2_01 | 919                     | 25                     | 0.0272 | 1.23E-09 | 7.76E-08    |
| TGGAAG_V\$NFAT_Q4_01 | 1896                    | 37                     | 0.0195 | 1.26E-09 | 7.76E-08    |

**Supplemental Table 5. Immunological gene enrichment signature.**

| Gene Set Name                                                | # Genes in Gene Set (K) | # Genes in Overlap (k) | k/K   | p-value  | FDR q-value |
|--------------------------------------------------------------|-------------------------|------------------------|-------|----------|-------------|
| GSE2706_UNSTIM_VS_2H_LP<br>S_DC_DN                           | 200                     | 35                     | 0.175 | 6.09E-40 | 1.16E-36    |
| GSE9988_LOW_LPS_VS_CTRL<br>TREATED_MONOCYTE_UP               | 200                     | 34                     | 0.17  | 2.29E-38 | 2.19E-35    |
| GSE2706_UNSTIM_VS_2H_LP<br>S_AND_R848_DC_DN                  | 200                     | 33                     | 0.165 | 8.31E-37 | 5.29E-34    |
| GSE2706_UNSTIM_VS_8H_R8<br>48_DC_DN                          | 200                     | 30                     | 0.15  | 3.10E-32 | 9.87E-30    |
| GSE9988_ANTI_TREM1_VS_A<br>NTI_TREM1_AND_LPS_MON<br>OCYTE_DN | 200                     | 30                     | 0.15  | 3.10E-32 | 9.87E-30    |
| GSE9988_ANTI_TREM1_VS_L<br>OW_LPS_MONOCYTE_DN                | 200                     | 30                     | 0.15  | 3.10E-32 | 9.87E-30    |
| GSE2706_UNSTIM_VS_2H_R8<br>48_DC_DN                          | 200                     | 29                     | 0.145 | 9.53E-31 | 2.28E-28    |
| GSE9988_LOW_LPS_VS_VEH<br>ICLE_TREATED_MONOCYTE_<br>UP       | 200                     | 29                     | 0.145 | 9.53E-31 | 2.28E-28    |
| GSE22886_CTRL_VS_LPS_24H<br>_DC_DN                           | 200                     | 28                     | 0.14  | 2.81E-29 | 4.47E-27    |
| GSE9988_ANTI_TREM1_VS_L<br>PS_MONOCYTE_DN                    | 200                     | 28                     | 0.14  | 2.81E-29 | 4.47E-27    |

**Figure S1**

**A**

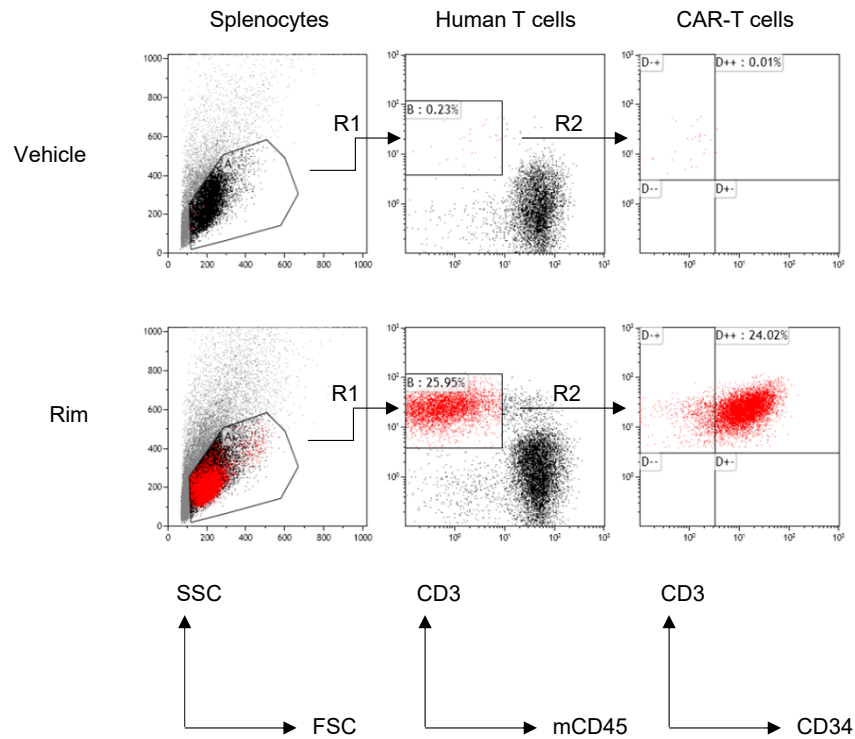

**B**

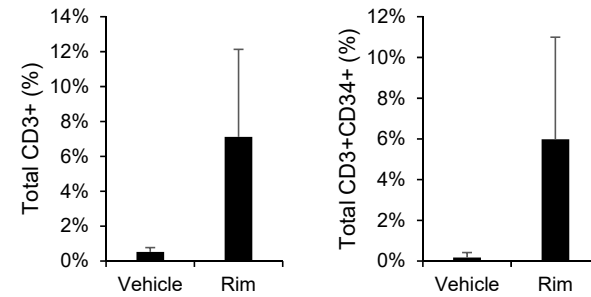

**Supplemental Figure 1. Activation of iMC increases the frequency of CAR-T cells following Rim administration.** **A)** NSG mice (n = 5 per group) engrafted with HPAC tumors were treated with  $1.0 \times 10^6$  iMC-PSCA. $\zeta$ -modified T cells and were subsequently injected i.p. with 5 mg/kg Rim on a weekly basis. On day 21 splenocytes were harvested and analyzed by flow cytometry. Human T cells were detected using a “live cell” region (R1) by gating on forward (FSC) and side scatter (SSC) profiles, followed by gating on a human CD3<sup>+</sup>/mouse CD45<sup>-</sup> region (R2). CAR-T cells were subsequently analyzed using a R1+R2 boolean gate and analyzing for CD3<sup>+</sup>CD34<sup>+</sup> T cells. **B)** Total percent human T cells for vehicle and Rim-treated mice and total percent gated CD3<sup>+</sup>CD34<sup>+</sup> CAR-T cells were quantitated.

Figure S2

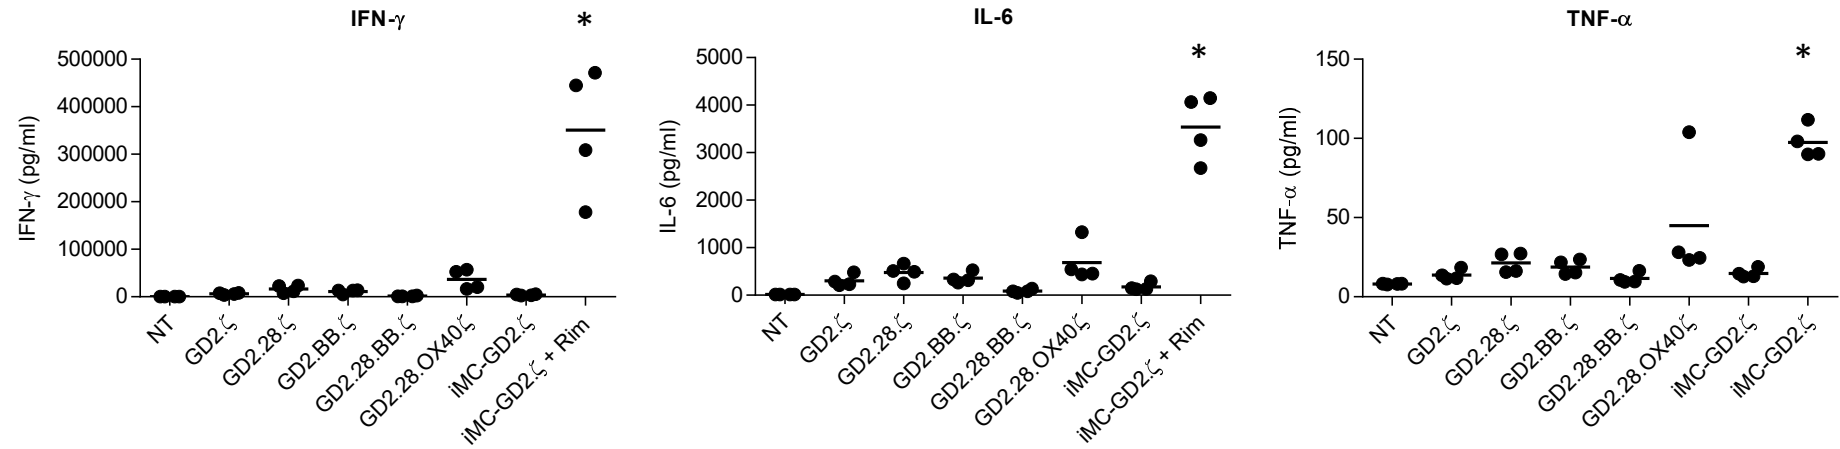

**Supplemental Figure 2. Cytokine production comparison of iMC-GD2- $\zeta$ -modified T cells compared to other CAR constructs after coculture with GD2<sup>+</sup> HT-144 tumor cells.** Non-transduced (NT) T cell or T cells transduced (n = 4) with various GD2-targeted vectors (Figure 7) were cocultured with HT-144 tumor cells at an effector to target (E:T) of 1:10 and analyzed for IL-6, IFN- $\gamma$  and TNF- $\alpha$  production after 48 hours in culture. \* indicates a *P*-value <0.001.

**Figure S3**

**A**

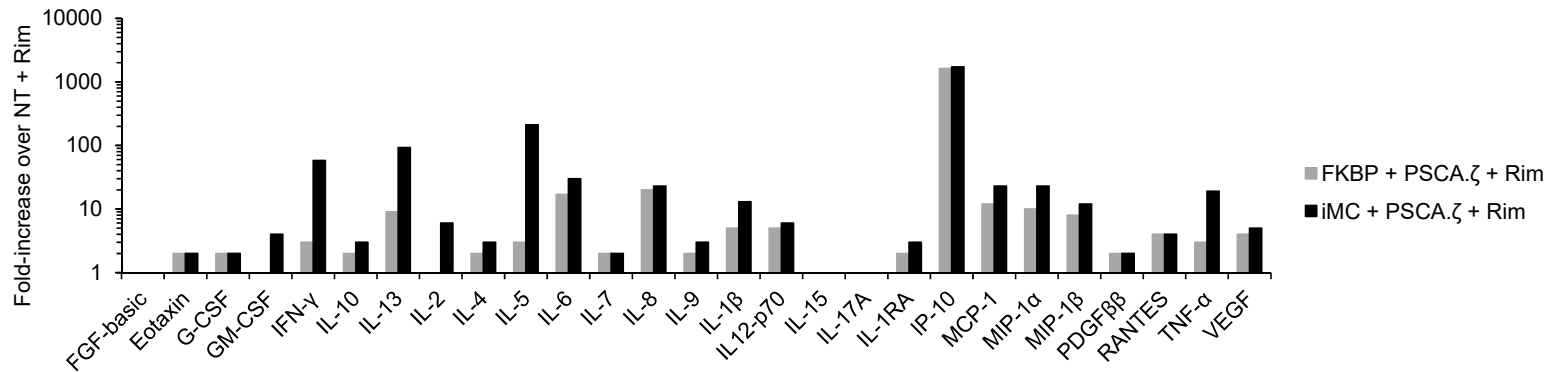

**B**

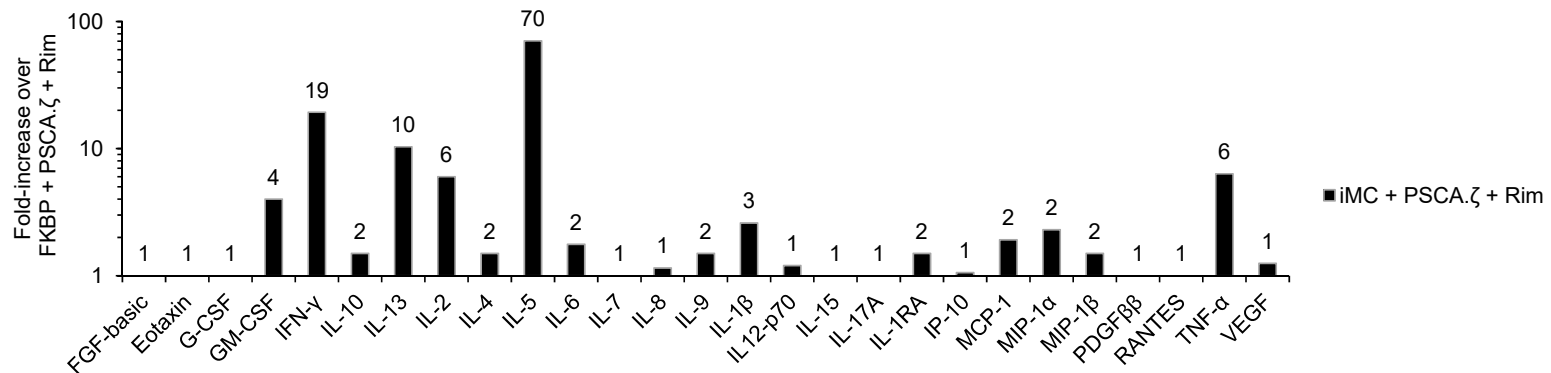

**Supplemental Figure 3. iMC enhances a broad cytokine production by PSCA-targeted CAR-T cells after stimulation with PSCA<sup>+</sup> HPAC tumor cells.** Non-transduced T cells and T cells co-transduced with either FKBP-ΔCD19 (FKBP; lacking the MyD88/CD40 signaling domains) and a first generation PSCA.ζ CAR, or transduced with iMC-ΔCD19 (iMC) and the PSCA.ζ CAR were cocultured with Capan-1 tumor cells at an effector to target (E:T) ratio of 1:1 in the presence of 10 nM Rim. After 48 hours, supernatants were analyzed using a 27-plex cytokine/chemokine array. **A)** FKBP + CAR + Rim and iMC + CAR + Rim conditions (two individual donors) were compared to NT + Rim cocultures and a fold-increase was calculated. **B)** Fold-increase of iMC + CAR + Rim was made against FKBP + CAR + Rim to assess the influence of iMC activation on cytokine production during CAR engagement of the PSCA antigen.
